# Supplementary material for: Automated Protocol for Monitoring Droplets and Fomites on Surfaces
Source: MDPI journal article supplement (doi:10.3390/microbiolres15010008), 2023-12-27
Supplement: s1 [file s1]

**Table S1.** Accuracy of DNA extraction in accordance with Best Practice Recommendations for Internal Validation of DNA Extraction Methods [52].

| Accuracy                | VN141R | MD141 | SD151 | CVN291 | MANUAL |
|-------------------------|--------|-------|-------|--------|--------|
| Specificity (%) *       | 1      | 1     | 1     | 1      | 1      |
| Sensibility (%) **      | 0.92   | 0.89  | 0.88  | 0.92   | 1      |
| Repeatability (CV%) *** | 19.9   | 16.0  | 19.8  | 13.8   | 24.6   |

\* Specificity=(True Negatives (D))/(True Negatives (D)+False Positives (B)); \*\* Sensibility=(True Positives (A))/(True Positives (A)+False Negatives (C)); \*\*\* CV%=(SD Yield DNA/mean Yield DNA)×100. The acceptability criteria were set at CV≤25%.

**Table S2.** Primers, probes and references [2,44,48,49,64].

| Target                            | Forward Primer             | Reverse Primer              | Probe                                | Reference              |
|-----------------------------------|----------------------------|-----------------------------|--------------------------------------|------------------------|
| <i>Propionibacterium</i> spp.     | CCGTGAGTGACGGTAA<br>TGGGTA | TTCCGACGCGATCAAC<br>CA      | AGCGTTGTCCGGATTATTGGG<br>CG          | Elshi et al, 2000      |
| <i>Corynebacterium</i> spp.       | ACCATCGACGAAGGGT<br>TTCT   | TCACCGCTACACCAGG<br>AATT    | GGCGATACGGGCATAAATTG                 | Piana et al., 2021     |
| <i>Bacteroides vulgatus</i>       | AAAGAAGTTCCTAGCG<br>CTGC   | GCTGGCTTTCTTTTACG<br>CCT    | TCTGAAAAACGTGCTCAGGC                 | Valeriani et al., 2018 |
| <i>Enterococcus</i> spp.          | AGAAATTCCAAACGAA<br>CTTG   | CAGTGCTCTACCTCCATTG<br>CATT | TGTTCTCTCCGAAATAGCTTT<br>AGGGCTA     | Valeriani et a., 2018  |
| <i>Staphylococcus epidermidis</i> | CAACTCGATGCAAATC<br>AGCAA  | GAACCGCATAGCTCCC<br>TGC     | TACTACGCTGGTGGAACTTCAA<br>ATCGTTATCG | Chung et al., 2016     |
| <i>Staphylococcus aureus</i>      | ACACCTGAAACAAAGC<br>ATCC   | CGCTAAGCCACGTCCA<br>TATT    | TGGTCTGAAGCAAGTGCATTT<br>ACGA        | Giampaoli et al., 2012 |
| <i>Streptococcus salivarius</i>   | GATGCCAAGGGTGAAG<br>TTGT   | GAGCCATCAGGATTCTG<br>TAGC   | TGGCGAACAGACGATCAACGG                | Giampaoli et al., 2012 |
| <i>Streptococcus mutans</i>       | CGGTTCTCAGCAAGAC<br>ATGA   | ATGGTACCCAATCCGC<br>AATA    | TGCAGTTAAAGCTCTGCATAA<br>AAGCGG      | Giampaoli et al., 2012 |

- [2] Piana, A., Colucci, M. E., Valeriani, F., Marcolongo, A., Sotgiu, G., Pasquarella, C., Margarucci, L. M., Petrucca, A., Gianfranceschi, G., Babudieri, S., Vitali, P., D'Ermo, G., Bizzarro, A., De Maio, F., Vitali, M., Azara, A., Romano, F., Simmaco, M., & Romano Spica, V. (2021). Monitoring COVID-19 Transmission Risks by Quantitative Real-Time PCR Tracing of Droplets in Hospital and Living Environments. *mSphere*, 6(1), e01070-20. <https://doi.org/10.1128/mSphere.01070-20>
- [44] Giampaoli S, Berti A, Valeriani F, Gianfranceschi G, Piccolella A, Buggiotti L, Rapone C, Valentini A, Ripani L, Romano Spica V. Molecular identification of vaginal fluid by microbial signature. *Forensic Sci Int Genet*. 2012 Sep;6(5):559-64. <https://doi.org/10.1016/j.fsigen.2012.01.005>
- [48] Eishi Y, Suga M, Ishige I, et al. Quantitative analysis of mycobacterial and propionibacterial DNA in lymph nodes of Japanese and European patients with sarcoidosis. *J Clin Microbiol*. 2000;40:198-204. <https://doi.org/10.1128/JCM.40.1.198-204.2002>
- [49] Valeriani, F., Agodi, A., Casini, B., Cristina, M. L., D'Errico, M. M., Gianfranceschi, G., Liguori, G., Liguori, R., Mucci, N., Mura, I., Pasquarella, C., Piana, A., Sotgiu, G., Privitera, G., Protano, C., Quattrocchi, A., Ripabelli, G., Rossini, A., Spagnolo, A. M., Tamburro, M., ... GISIO Working Group of the Italian Society of Hygiene, Preventive Medicine, and Public Health (2018). Potential testing of reprocessing procedures by real-time polymerase chain reaction: A multicenter study of colonoscopy devices. *American journal of infection control*, 46(2), 159–164. <https://doi.org/10.1016/j.ajic.2017.08.008>
- [64] Chung Y, Kim TS, Min YG, et al. Usefulness of Multiplex Real-Time PCR for Simultaneous Pathogen Detection and Resistance Profiling of Staphylococcal Bacteremia. *Biomed Res Int*. 2016;2016:6913860. <https://doi.org/10.1155/2016/6913860>
